# Supplementary material for: Systematic review and meta-analysis of prevalence of, and risk factors for, pelvic floor disorders in community-dwelling women in low and middle-income countries: a protocol study
Source: PubMed Central journal article supplement — BMJ Open. 2017 Jun 8;7(6):e015626. doi: 10.1136/bmjopen-2016-015626 (PMC5734409; doi:10.1136/bmjopen-2016-015626), 2017-06-08
Supplement: bmjopen-2016-015626supp001.pdf [file bmjopen-2016-015626supp001.pdf]

# Data Extraction Form adapted from the Cochrane Collaboration

**Title of the systematic review:** *Prevalence of, and risk factors for, pelvic floor disorders in community-dwelling women in low-and-middle income countries: a systematic review and meta-analysis*

**Trial Registration no:** CRD42016043881

This form has been developed by adopting and customizing the “Data collection form for intervention review – RCTs and non-RCTs” of The Cochrane Collaboration. Some new sections have been added into this tool and the irrelevant sections have been removed from the original form. Information included on this form should be comprehensive, and may be used in the text of the review.

## Notes on using this data extraction form:

- Be consistent in the order and style you use to describe the information for each included study
- Record any missing information as unclear or not described, to make it clear that the information was not found in the study report(s), not that you forgot to extract it.
- Include any instructions and decision rules on the Data Extraction Form, or in an accompanying document. It is important to practice using the form and give training to any other authors using the form.
- We will protect the document in order to use the form fields (Tools / Protect document)

## 1. General Information

|                                                                                                                                           |  |
|-------------------------------------------------------------------------------------------------------------------------------------------|--|
| 1. <b>Date form completed</b><br><i>(dd/mm/yyyy)</i>                                                                                      |  |
| 2. <b>Name/ID of person extracting data</b>                                                                                               |  |
| 3. <b>Report title</b> <i>(title of paper/ abstract/ report that data are extracted from)</i>                                             |  |
| 4. <b>Report contact details of person extracting data</b>                                                                                |  |
| 5. <b>Publication type</b> <i>(e.g. full report, abstract, letter)</i>                                                                    |  |
| 6. <b>Study ID</b> <i>(e.g. 01 plus surname of first author and year first full report of study was published e.g. Smith 2001)</i>        |  |
| 7. <b>Country in which the study conducted</b>                                                                                            |  |
| 8. <b>Economic level of the country in which the study conducted</b> <i>(e.g. low income, lower-middle income or upper-middle income)</i> |  |

|                                                                                          |  |
|------------------------------------------------------------------------------------------|--|
| 9. <b>Study funding source</b> ( <i>including role of funders</i> )                      |  |
| 10. <b>Possible conflicts of interest</b> ( <i>for study authors e.g. not reported</i> ) |  |
| 11. <b>Notes:</b>                                                                        |  |

## 2. Eligibility

| <b>Study Characteristics</b>                                                                                                                     | <b>Review Inclusion Criteria</b> ( <i>Insert inclusion criteria for each characteristic as defined in the Protocol e.g. cross-sectional, cohort or case-control</i> ) | <b>Location in text</b><br>( <i>page#/fig/table</i> ) |
|--------------------------------------------------------------------------------------------------------------------------------------------------|-----------------------------------------------------------------------------------------------------------------------------------------------------------------------|-------------------------------------------------------|
| 12. <b>Type of study</b>                                                                                                                         |                                                                                                                                                                       | P2                                                    |
| 13. <b>Population description</b>                                                                                                                |                                                                                                                                                                       | P2                                                    |
| 14. <b>Focused diseases / conditions</b><br>( <i>Urinary incontinence, Faecal incontinence, pelvic organ prolapse, or at least one of them</i> ) |                                                                                                                                                                       | P2                                                    |
| 15. <b>Types of outcome measures</b><br>( <i>Prevalence/Risk factors</i> )                                                                       |                                                                                                                                                                       | P1<br><br>P1                                          |
| 16. <b>Decision</b> ( <i>with reasons for either inclusion or exclusion</i> )                                                                    |                                                                                                                                                                       |                                                       |
| 17. <b>Notes:</b>                                                                                                                                |                                                                                                                                                                       |                                                       |

**DO NOT PROCEED IF STUDY IS EXCLUDED FROM REVIEW**

## 3. Population and setting

|                                                                                      | <b>Description</b> | <b>Location in text</b><br>( <i>page#/fig/table</i> ) |
|--------------------------------------------------------------------------------------|--------------------|-------------------------------------------------------|
| 18. <b>Population description</b> ( <i>from which study participants are drawn</i> ) |                    |                                                       |

|                                                                                             | Description | Location in text<br>(page#/fig/table) |
|---------------------------------------------------------------------------------------------|-------------|---------------------------------------|
| 19. <b>Source/setting of the population</b><br>(e.g. urban, rural, particular ethnic group) |             |                                       |
| 20. <b>Method/s of recruitment of participants</b>                                          |             |                                       |
| 21. <b>Notes:</b>                                                                           |             |                                       |

#### 4. Methods

|                                                                                     | Descriptions as stated in report/paper | Location in text<br>(page#/fig/table) |
|-------------------------------------------------------------------------------------|----------------------------------------|---------------------------------------|
| 22. <b>Aim of study</b>                                                             |                                        |                                       |
| 23. <b>Design</b><br>(e.g. cross-sectional study, cohort study, case-control study) |                                        |                                       |
| 24. <b>Sampling technique</b> (e.g. random or convenience)                          |                                        |                                       |
| 25. <b>Study start date</b>                                                         |                                        |                                       |
| 26. <b>Study End date/duration</b> (if any cohort)                                  |                                        |                                       |
| 27. <b>Notes:</b>                                                                   |                                        |                                       |

#### 5. Participants

Provide overall data and, if available, comparative data for each intervention or comparison group.

|                                                     | Description as stated in report/paper | Location in text<br>(page#/fig/table) |
|-----------------------------------------------------|---------------------------------------|---------------------------------------|
| 28. <b>Total number of participants/Sample size</b> |                                       |                                       |
| 29. <b>Age group</b>                                |                                       |                                       |

|                                      | Description as stated in report/paper | Location in text<br><i>(page#/fig/table)</i> |
|--------------------------------------|---------------------------------------|----------------------------------------------|
| 30. Menopause status <i>(if any)</i> |                                       |                                              |
| 31. Notes:                           |                                       |                                              |

## 6. Outcomes

| How outcomes measured                                                                               | Description as stated in report/paper | Location in text<br><i>(page#/fig/table)</i> |
|-----------------------------------------------------------------------------------------------------|---------------------------------------|----------------------------------------------|
| 32. Outcomes <i>(detected by physical examination: who examined?)</i>                               |                                       |                                              |
| 33. Self-reported reported outcomes <i>(detected by questionnaire: validated or non-validated?)</i> |                                       |                                              |

Copy and paste table for each outcome.

| Outcome 1: Prevalence<br><br>(Note: Not detail here under outcome. Detail should be reported in results section)        | Description as stated in report/paper | Location in text<br><i>(page#/fig/table)</i> |
|-------------------------------------------------------------------------------------------------------------------------|---------------------------------------|----------------------------------------------|
| 34. Outcome names<br><i>(Urinary incontinence, Faecal incontinence, pelvic organ prolapse, or at least one of them)</i> |                                       |                                              |
| 35. Time points measured <i>(report the start year/specify whether from start and end of intervention)</i>              |                                       |                                              |
| 36. Time points reported                                                                                                |                                       |                                              |

| <b>Outcome 1: Prevalence</b><br>(Note: Not detail here under outcome. Detail should be reported in results section)                                                                                                                                                                                                                                                       | Description as stated in report/paper | Location in text<br>(page#/fig/table) |
|---------------------------------------------------------------------------------------------------------------------------------------------------------------------------------------------------------------------------------------------------------------------------------------------------------------------------------------------------------------------------|---------------------------------------|---------------------------------------|
| 37. <b>Outcome definition</b> (e.g. whether standard case definition used: some standard definitions are: Pelvic Organ Prolapse Distress Inventory 6 (POPDI-6), Colorectal-Anal Distress Inventory 8 (CRADI-8), Question for Urinary Incontinence Diagnosis (QUID), Urinary Distress Inventory 8 (UD1-6), International Consultation on Incontinence Society (ICIS) etc.) |                                       |                                       |
| 38. <b>Type of measurement</b><br>(Percentage/Odds ratio/Risk ratio)                                                                                                                                                                                                                                                                                                      |                                       |                                       |
| 39. <b>Is outcome/tool validated?</b><br>(Yes/No/Unclear/Not mentioned)                                                                                                                                                                                                                                                                                                   |                                       |                                       |
| 40. <b>Notes:</b>                                                                                                                                                                                                                                                                                                                                                         |                                       |                                       |

| <b>Outcome 2: Risk factors</b><br>(not detail here)                                                        | Description as stated in report/paper | Location in text<br>((page#/fig/table) |
|------------------------------------------------------------------------------------------------------------|---------------------------------------|----------------------------------------|
| 41. <b>Name of the risk factors</b> (e.g. risk factors of POP)                                             |                                       |                                        |
| 42. <b>Time points measured</b> (report the start year/specify whether from start and end of intervention) |                                       |                                        |
| 43. <b>Time points reported</b>                                                                            |                                       |                                        |
| 44. <b>Definition of risk factors</b> (if any)                                                             |                                       |                                        |
| 45. <b>Type of measurement</b><br>(Percentage/Odds ratio/Risk ratio)                                       |                                       |                                        |
| 46. <b>Is outcome/tool validated?</b><br>(Yes/No/Unclear/Not mentioned)                                    |                                       |                                        |
| 47. <b>Notes:</b>                                                                                          |                                       |                                        |

## 7. Results and findings

Copy and paste the appropriate table for each outcome, including additional tables for each time point and subgroup as required.

| Outcome 1: Prevalence<br>(Note: detail here)                                                  | Description as stated in report/paper | Location in text<br>(page#/fig/table) |
|-----------------------------------------------------------------------------------------------|---------------------------------------|---------------------------------------|
| 48. Outcome                                                                                   |                                       |                                       |
| 49. Subgroup (if any, e.g. age-specific prevalence reporting)                                 |                                       |                                       |
| 50. Results                                                                                   |                                       |                                       |
| 51. Response/non-response rate                                                                |                                       |                                       |
| 52. Any other results reported                                                                |                                       |                                       |
| 53. Unit of analysis (e.g. by individuals)                                                    |                                       |                                       |
| 54. Statistical methods used and appropriateness of these methods (e.g. proportion/%s, RR/OR) |                                       |                                       |
| 55. Whether results weighted? (e.g. Yes/No)                                                   |                                       |                                       |
| 56. Notes:                                                                                    |                                       |                                       |

| Outcome 2: Risk factors<br>(Note: detail here)                      | Description as stated in report/paper | Location in text<br>(page#/fig/table) |
|---------------------------------------------------------------------|---------------------------------------|---------------------------------------|
| 57. Name of the risk factors<br>NB this is confusing; change to RF? |                                       |                                       |
| 58. Results                                                         |                                       |                                       |
| 59. Response/non-response rate                                      |                                       |                                       |
| 60. Any other results reported                                      |                                       |                                       |
| 61. Unit of analysis (e.g. by individuals)                          |                                       |                                       |

| Outcome 2: Risk factors<br>(Note: detail here)                                                | Description as stated in report/paper | Location in text<br>(page#/fig/table) |
|-----------------------------------------------------------------------------------------------|---------------------------------------|---------------------------------------|
| 62. Statistical methods used and appropriateness of these methods (e.g. proportion/%s, RR/OR) |                                       |                                       |
| 63. All systematic and random error adjusted? (e.g. confounding, effect medication etc.)      |                                       |                                       |
| 64. Notes:                                                                                    |                                       |                                       |

## 8. Limitation and mitigation strategy

|                                           | Description as stated in report/paper | Location in text (page#/fig/table) |
|-------------------------------------------|---------------------------------------|------------------------------------|
| 65. Strength                              |                                       |                                    |
| 66. Limitation                            |                                       |                                    |
| 67. Strategies to overcome the limitation |                                       |                                    |
| 68. Notes:                                |                                       |                                    |

## 9. Conclusion and other information

|                                      | Description as stated in report/paper | Location in text<br>(page#/fig/table) |
|--------------------------------------|---------------------------------------|---------------------------------------|
| 69. Key conclusions of study authors |                                       |                                       |
| 70. Notes:                           |                                       |                                       |

## 10. Risk of bias (Quality Assessment)

| <b>External/Internal Validity</b><br><br>(Note: some criteria would be overlapping with what you have reported in earlier sections. So, please report again to get quick understanding of the quality of the paper)    | <b>Often it would not be stated directly in the paper. So, data extractors is/are requested to find information and state (Yes/No)</b> | <b>Location in text</b><br><i>(page#/fig/table)</i> |
|------------------------------------------------------------------------------------------------------------------------------------------------------------------------------------------------------------------------|----------------------------------------------------------------------------------------------------------------------------------------|-----------------------------------------------------|
| 71. <b>Was the study's target population a close representation of the national population in relation to relevant variables?</b>                                                                                      |                                                                                                                                        |                                                     |
| 72. <b>Was the sampling frame a true or close representation of the target population?</b>                                                                                                                             |                                                                                                                                        |                                                     |
| 73. <b>Was some form of random selection used to select the sample, OR was a census undertaken?</b>                                                                                                                    |                                                                                                                                        |                                                     |
| 74. <b>Was the likelihood of nonresponse bias minimal?</b>                                                                                                                                                             |                                                                                                                                        |                                                     |
| 75. <b>Were data collected directly from the subjects (as opposed to a proxy)?</b>                                                                                                                                     |                                                                                                                                        |                                                     |
| 76. <b>Was an acceptable case definition used in the study?</b>                                                                                                                                                        |                                                                                                                                        |                                                     |
| 77. <b>Was the study instrument that measured the parameter of interest shown to have validity and reliability?</b>                                                                                                    |                                                                                                                                        |                                                     |
| 78. <b>Was the same mode of data collection used for all subjects?</b>                                                                                                                                                 |                                                                                                                                        |                                                     |
| 79. <b>Was the length of the shortest prevalence period for the parameter of interest appropriate</b> <i>(last two weeks or life time prevalence etc. please specify exact period over which symptoms were asked?)</i> |                                                                                                                                        |                                                     |
| 80. <b>Were the numerator(s) and denominator(s) for the parameter of interest appropriate?</b>                                                                                                                         |                                                                                                                                        |                                                     |
| 81. <b>Notes</b>                                                                                                                                                                                                       |                                                                                                                                        |                                                     |
